# Supplementary material for: Members of the GADD45 Protein Family Show Distinct Propensities to form Toxic Amyloid-Like Aggregates in Physiological Conditions
Source: MDPI journal article supplement (doi:10.3390/ijms221910700), 2021-10-02
Supplement: s1 [file s1]

## Title Page

# Members of the GADD45 protein family show distinct propensities to form toxic amyloid-like aggregates in physiological conditions

## Authors

Giovanni Smaldone<sup>1^</sup>, Daniela Caruso<sup>2^</sup>, Annamaria Sandomenico<sup>2</sup>, Emanuela Iaccarino<sup>2</sup>, Annalia Focà<sup>2</sup>, Alessia Ruggiero<sup>2</sup>, Menotti Ruvo<sup>2\*</sup>, Luigi Vitagliano<sup>2\*</sup>

## Affiliations

<sup>1</sup> IRCCS SDN, Napoli, Via E. Gianturco 113, 80143 Napoli Italy

<sup>2</sup> Institute of Biostructures and Bioimaging, C.N.R, Via Mezzocannone 16, 80134, Napoli, Italy.

Email: [luigi.vitagliano@unina.it](mailto:luigi.vitagliano@unina.it); [menotti.ruvo@unina.it](mailto:menotti.ruvo@unina.it)

<sup>^</sup>Equally Contributed

<sup>\*</sup>Corresponding authors

**Keywords** protein aggregation; amyloid-like toxicity, structure-stability relationships

## Abbreviations

GADD, Growth Arrest and DNA Damage-inducible;

CD; Circular dichroism;

ThT; Thioflavin T

MKK7 Mitogen-Activated Protein Kinase 7

MKK7\_KD Mitogen-Activated Protein Kinase 7\_ Kinase Domain

BLI Bio-Layer Interferometry

## Highlights – (three to five)

GADD45 $\alpha$ , GADD45 $\beta$ , and GADD45 $\gamma$  presents distinct thermal stabilities and unfolding pathways

GADD45 $\alpha$  and GADD45 $\beta$  form amyloid-like aggregates upon thermal treatments

GADD45 $\alpha$  and GADD45 $\beta$  aggregates are toxic against SHSY-5Y and HepG2 cells

GADD45 $\beta$  forms toxic aggregates in nearly physiological conditions

Present findings provide a new framework for interpreting the many functions of GADD45 proteins

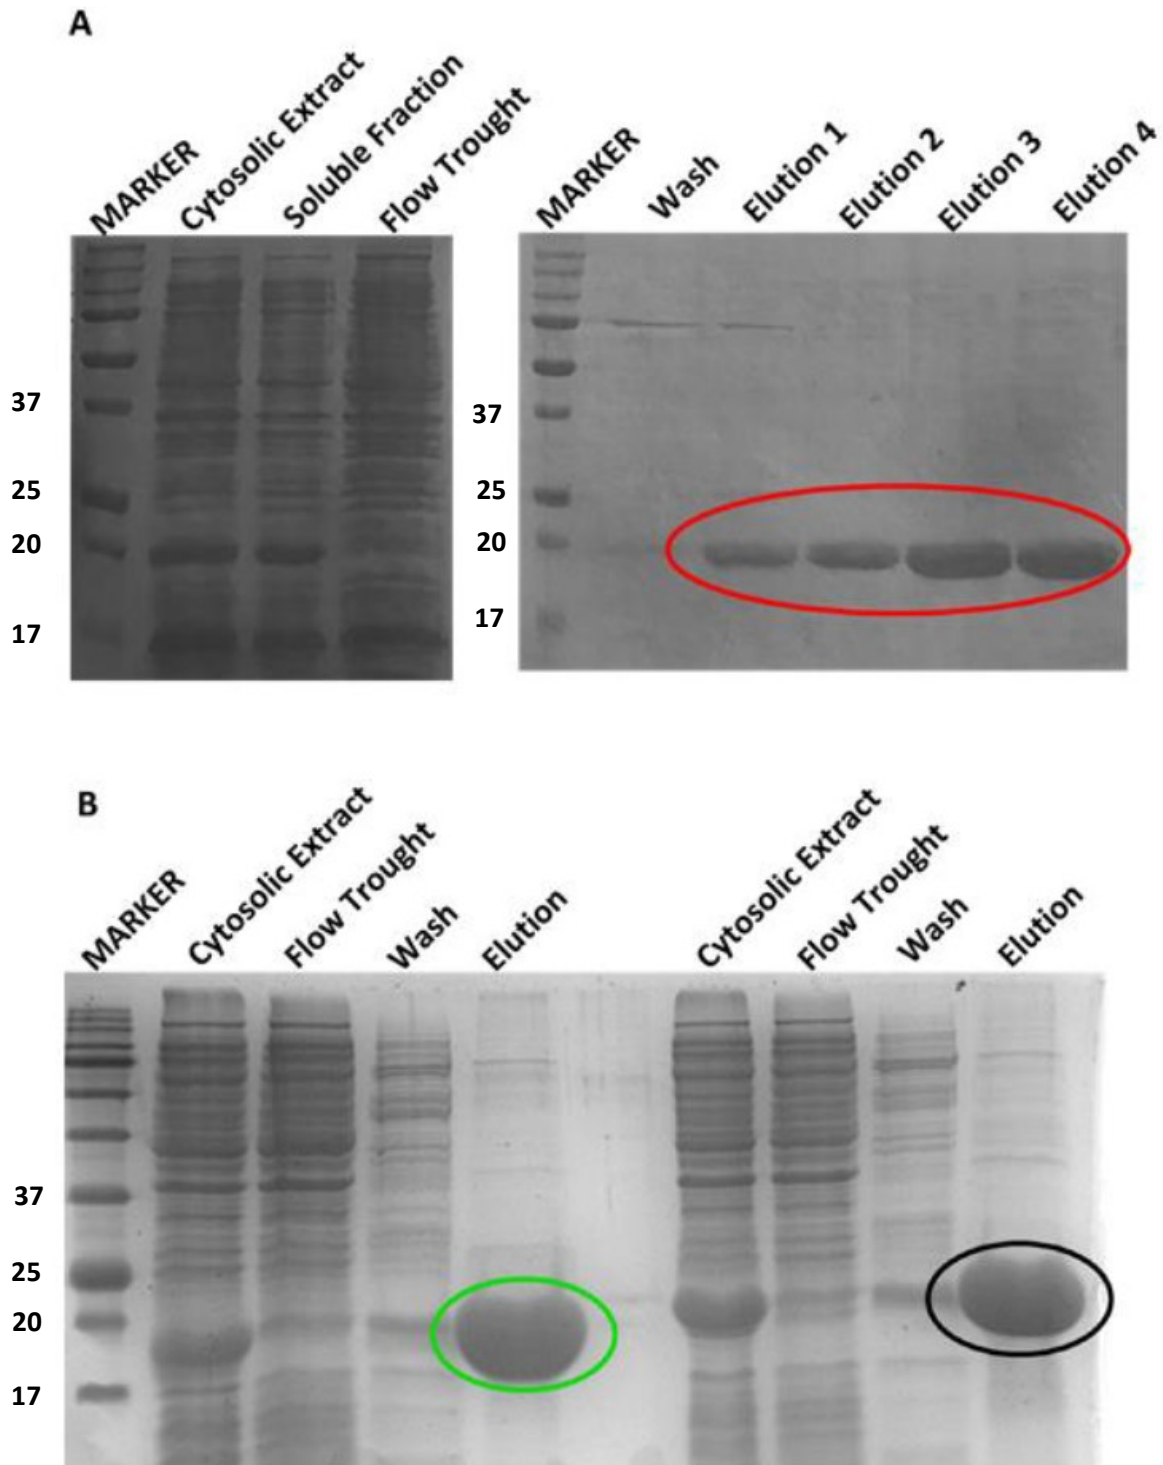

**Figure S1.** SDS-PAGE analysis of *GADDβ* (A), *GADDα* and *GADDγ* (B) Hys-Trap purification. Numbers represent molecular weight of protein marker expressed in kDA.

```

GADDγ  MTLEEVRGQDTVPESTARMQGAGKALHELLLSAQRQGCLTAGVYESAKVLNVDPNVTFC 60
GADDα  MTLEEFSAQE---QKTERMDKVGDALEEVLSKALSQRTITVGVYEAAKLLNVDPNVVL 57
GADDβ  MTLEELVACD---NAAQKMQTVTAAVEELLVAAQRQDRLTVGVYESAKLMNVDPSVVL 57
      *****. . : : :*: . *:.*:* * * :*.*****:***:*****.*.:*

GADDγ  VLAAGEEDEGDIALQIHFTLIQAFCCENDIDIVRVGDVQRLAAIVG-----AGEEAG 112
GADDα  LLAADEDDDRVALQIHFTLIQAFCCENDINILRVSNPGRLAELLLLETDAGPAASEGAE 117
GADDβ  LLAIDEEEDDIALQIHFTLIQSFCNDINIVRVSGMQRLAQLL-----GEP AETQGT 112
      :** .*::: *:*****:***:***:***. . *** :: : :

GADDγ  APGDLHCILISNPNEAWKDPALEKLSLFCESRSVNDWVPSITLPE- 159
GADDα  QPPDLHCVLVTNPHSSQWKDPALSQLICFRESRYMDQWVPVINLPER 165
GADDβ  EARDLHCLLVTNPHDAWKSHGLVEVASYCESRGNNQWVPYISLQER 160
      *****:***:***: . ** . * :: :*.*** :*:*** *.* *

```

**Figure S2.** Multiple alignment of GADD $\alpha$ , GADD $\beta$  and GADD $\gamma$  sequences. Symbol code: \*= conserved residues, ( . :) non conserved residues sharing high (:) or moderate (.) chemico-physical properties. Color code: hydrophobic residues – red; positively charged residues – pink; negatively charged residues – blue; polar residues – green;

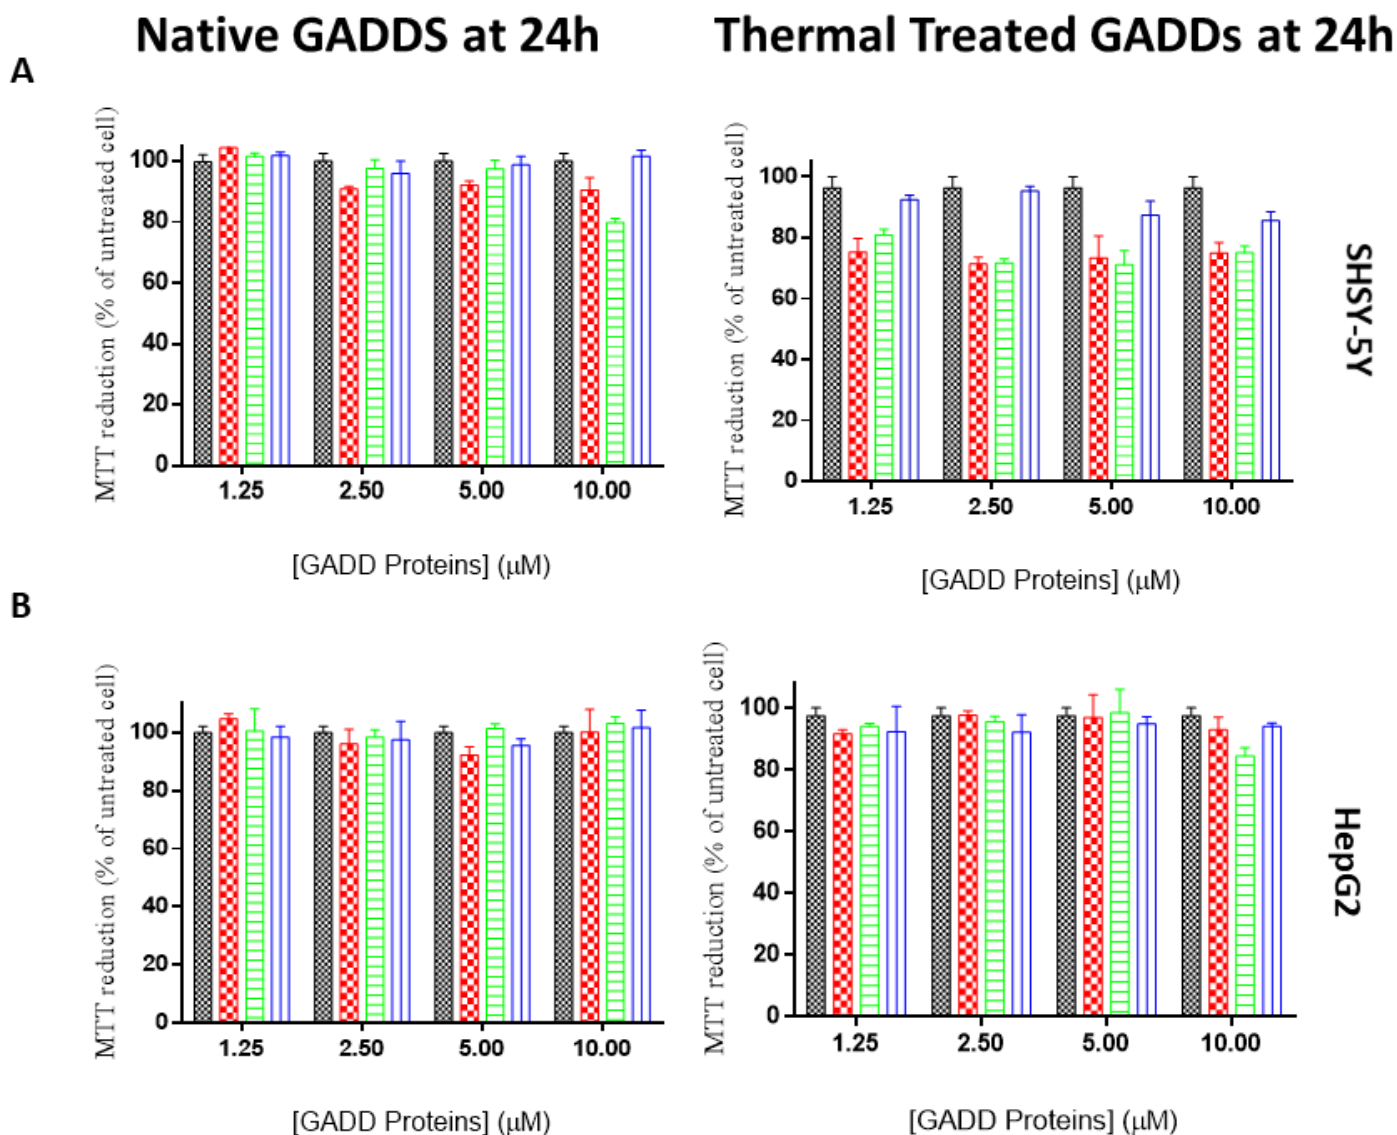

**Figure S3. MTT assay on SHSY-5Y and HepG2 cell lines at 24h of incubation.** MMT viability assays performed on the SHSY-5Y (A) and HepG2 (B) cell lines after treatment with native GADD45 proteins (left) and thermal treated GADD45 proteins (right) at different concentrations. Black bars refer to the untreated cells; red bars refer to GADD45 $\alpha$ , green bars refer to GADD45 $\beta$ ; blue bars refer to GADD45 $\gamma$ . No significant differences occurs in every conditions tested. Cell survival was expressed as percentage of viable cells in the presence of GADD proteins, compared to control cells grown in their absence. Error represent Standard Deviation. Experiments were repeated twice with similar results.

**Table S1. Theoretical versus experimental molecular weights of the three GADD45 proteins**  
Molecular weights consider the presence of different His-Tag in the three isoforms. The experimental molecular weights are in close agreement (within few Da) if the loss of the N-terminal methionine ( $\Delta$  molecular mass = -131.2) is assumed .

| PROTEIN                          | THEORETICAL MOLECULAR<br>MASS (Da) | EXPERIMENTAL MOLECULAR<br>MASS (Da) |
|----------------------------------|------------------------------------|-------------------------------------|
| <b>GADD45<math>\alpha</math></b> | 20499.1 <sup>a</sup>               | 20367.9 <sup>a</sup>                |
| <b>GADD45<math>\beta</math></b>  | 19327.7 <sup>b</sup>               | 19192.1 <sup>b</sup>                |
| <b>GADD45<math>\gamma</math></b> | 19284.6 <sup>a</sup>               | 19153.6 <sup>a</sup>                |

<sup>a</sup>The construct contains an N-terminal His-tag :**MGSSHHHHHH SSGLVPRGSH**

<sup>b</sup>The construct contains an N-terminal His-Tag: **MGSSHHHHHH GGIP**
